# Supplementary material for: Modelling Bovine Granuloma Formation In Vitro upon Infection with Mycobacterium Avium Subspecies Paratuberculosis
Source: PubMed Central journal article supplement (PMC6958389; doi:10.3390/vetsci6040080), 2019-10-12
Supplement: vetsci-06-00080-s001.pdf [file vetsci-06-00080-s001.pdf]

Supplement

Table S1. Primer sequences for RT-qPCR

| Primer Target                                    | Forward Sequence      | Reverse Sequence     |
|--------------------------------------------------|-----------------------|----------------------|
| <i>Actin</i>                                     | ctaaggagaaggggcccagtc | tgatggctgtccattcaaaa |
| <i>Interleukin 1<math>\beta</math></i>           | ggaaatggcaacctactcca  | ttcagtcgtgtccgactctg |
| <i>Interleukin 4</i>                             | cagtgtctggctgtcttactg | aggatgttcagcgttttgat |
| <i>Interleukin 10</i>                            | ctccaagagaggggtgtcta  | tgcttcacttttgcattctc |
| <i>Interleukin 12</i>                            | actactccaaaacctgctg   | atcgatctctcagaagtgc  |
| <i>Interleukin 18</i>                            | aaagggacctcaaaccttc   | ccacaaagctgatgcaataa |
| <i>Interferon <math>\gamma</math></i>            | ttcaactactccggcctaac  | ggccataagaaccagaaaaa |
| <i>Tumor growth factor <math>\beta</math></i>    | ccatactggccctttacaac  | gacctcctggcgtagtagt  |
| <i>Tumor necrosis factor <math>\alpha</math></i> | actcacaggtctcttcagg   | gttgaccttggtctggtagg |

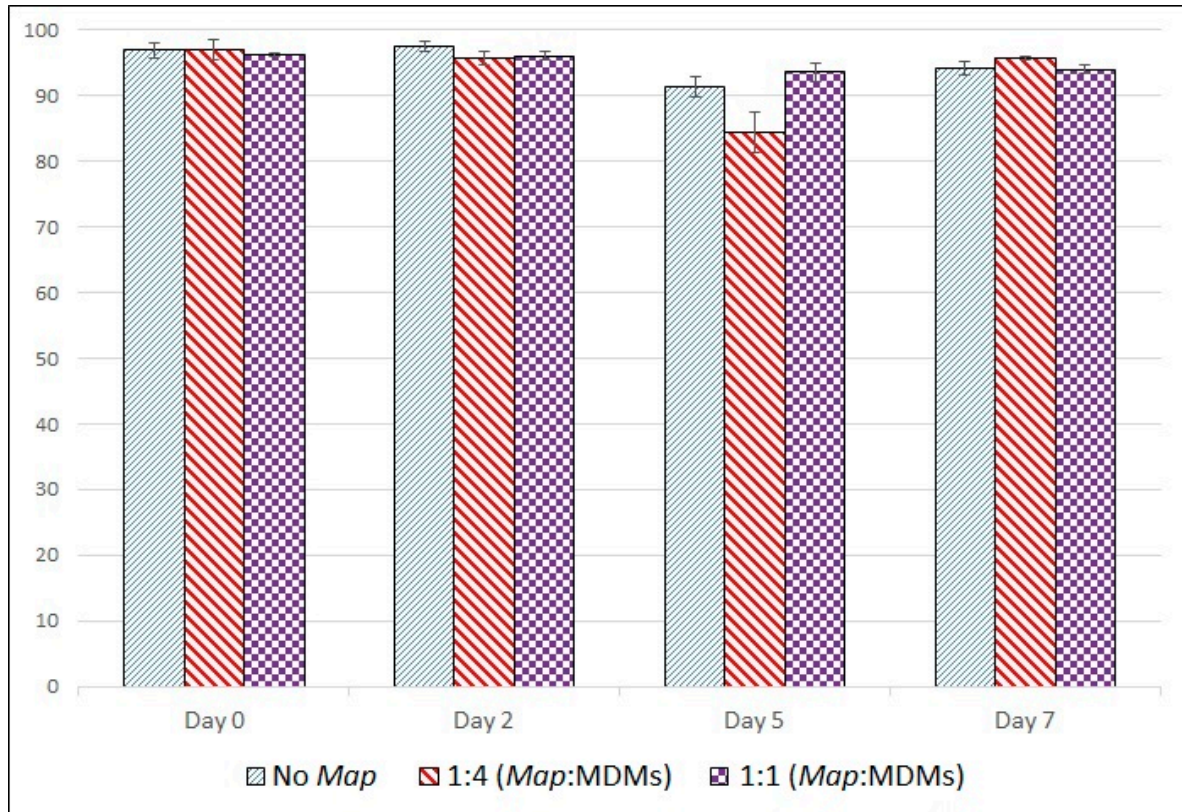

Figure S1. Viability of adherent MDMs by day by LIVE/DEAD fluorescent assay. Expressed as a percentage of total cells. Bars are standard deviation (n = 3).

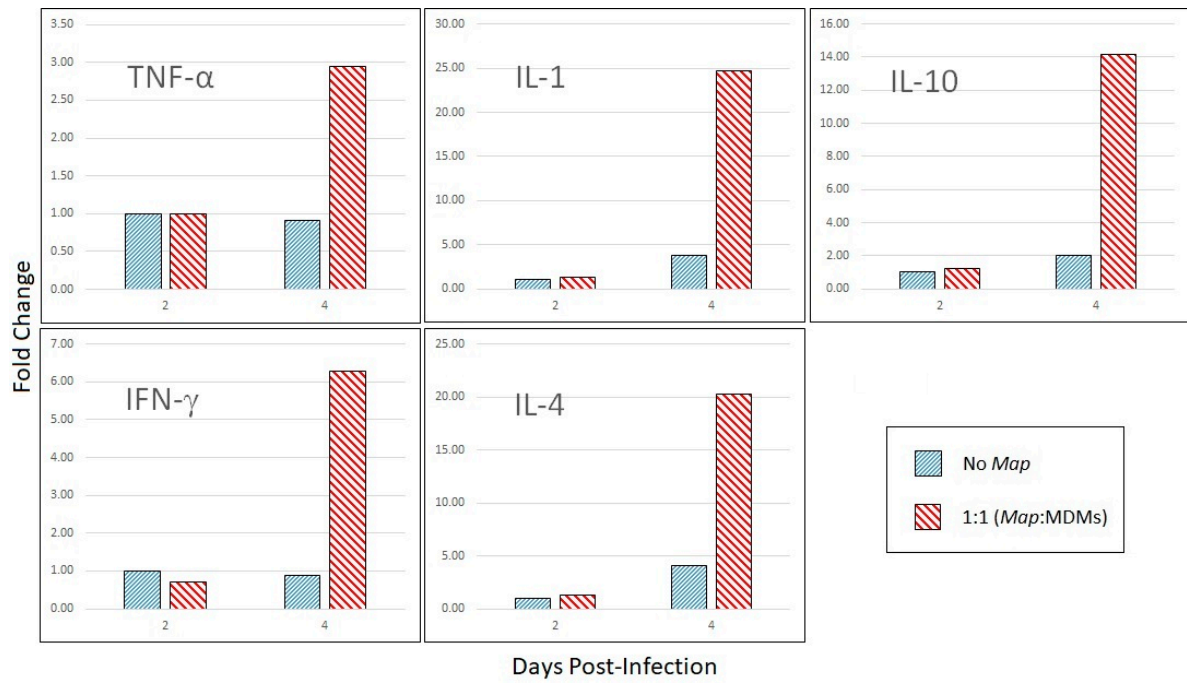

**Figure S2. Cytokine profile shift of MDMs infected with 1:1 MOI of *Map*.** Cytokine expression of MDMs infected with *Map* at MOI of 1:1 compared to same-day uninfected MDMs. RT-qPCR was run using actin as internal control, and the data was converted to fold-change by  $\Delta\text{-}\Delta\text{-}C_t$  method. Data collected in duplicate. Results are representative of two experiments.
